# Supplementary material
Source: publisher site journal article supplement (https://www.dovepress.com/article/222422)
Supplement: Supplementary file 1 [file get_supplementary_file.php]

## Supplementary materials

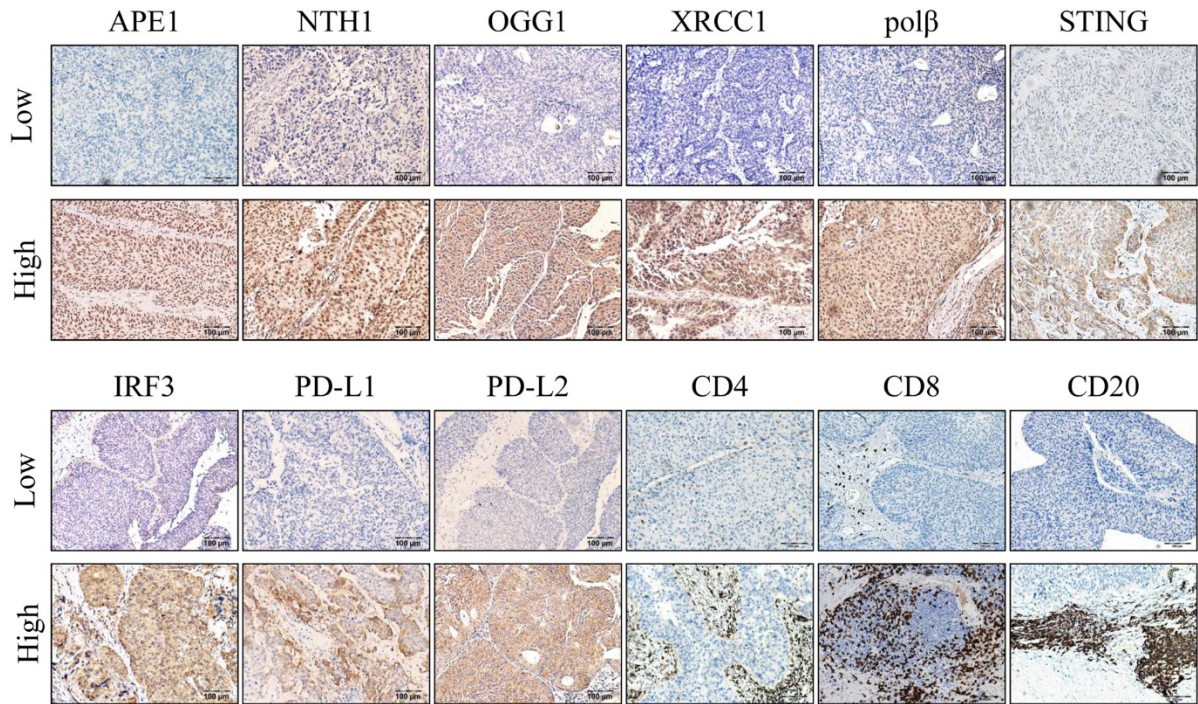

Figure S1. Immunohistochemical expression of makers in upper tract urothelial carcinoma tissue. (bar=100um). The two groups of low and high expression are mainly showed.

Table S1 Immunohistochemical antibody, use concentrations, and methods of heat induced epitope repair.

| Antibody                               | Company                                             | Host   | HIER             | concentration |
|----------------------------------------|-----------------------------------------------------|--------|------------------|---------------|
| APE1                                   | Abcam ab194                                         | Rabbit | Citrate          | 1:500         |
| NTH1                                   | Abcam ab 236143                                     | Rabbit | Tris/EDTA pH 9.0 | 1:200         |
| OGG1                                   | Novus biological NB100-106                          | Rabbit | Tris/EDTA pH 9.0 | 1:100         |
| POLB                                   | Abcam ab26343                                       | Rabbit | Tris/EDTA pH 9.0 | 1:150         |
| XRCC1                                  | Abcam ab1838                                        | Mouse  | Citrate          | 1:100         |
| STING                                  | CST #13647                                          | Rabbit | Tris/EDTA pH 9.0 | 1:100         |
| IRF3                                   | Abcam ab68481                                       | Rabbit | Tris/EDTA pH 9.0 | 1:300         |
| PD-L2                                  | Abcam ab231145                                      | Rabbit | Citrate          | 1:50          |
| PD-L1                                  | Maxim biotechnologies,<br>(Fuzhou, China), RMA-0724 | Rabbit | Tris/EDTA pH 9.0 | 1:1           |
| CD4                                    | Maxim biotechnologies,<br>(Fuzhou, China), RMA-0620 | Rabbit | Citrate          | 1:1           |
| CD8                                    | Maxim biotechnologies,<br>(Fuzhou, China), RMA-0514 | Rabbit | Tris/EDTA pH 9.0 | 1:1           |
| CD20                                   | Maxim biotechnologies,<br>(Fuzhou, China), kit-0001 | Mouse  | Citrate          | 1:1           |
| IgG/anti-rabbit IgG secondary antibody | Maxim biotechnologies,<br>(Fuzhou, China), Kit-0038 |        |                  |               |
| DAB                                    | Maxim biotechnologies,<br>(Fuzhou, China), Kit-0038 |        |                  |               |
